# Supplementary material
Source: PubMed Central journal article supplement (PMC5818201)
Supplement: 10.1074_M117.809137_jbc.M117.809137-1.pdf [file 10.1074_M117.809137_jbc.M117.809137-1.pdf]

## **Supplementary Information**

**Supplementary Fig S1:** 600 MHz <sup>1</sup>H NMR spectrum of compounds C1 and C2.

**Supplementary Fig S2:** LC-HRMS Data for Compounds C1 and C2. The high-resolution mass spectrum of C1 and C2 indicated the desired [M+H] mass of the respective molecular ions and was consistent with the structural assignment and >95% purity. HRMS data were obtained on a Thermo Scientific Exactive Orbitrap LC-MS (ESI positive ion mode) coupled to a Thermo Scientific Accela HPLC system using a 3.5 μm Waters XTerra C18 column (2.1 x 50 mm; 10 min gradient elution with MeCN/H<sub>2</sub>O/MeOH containing 0.1% formic acid at a flow rate of 500 μL/min from 3:92:5 at 0-0.5 min to 93:2:5 at 4.0 min, back to 3:92:5 from 6.0 to 7.5 min).

**Supplementary Fig S3:** Representative phase-contrast images of aortic rings subjected to either DMSO or compound (C1/C2) treatment. Arrows show endothelial sprouts (scale bar - 200 μm).

**Supplementary Table S1:** A complete list of the initial 20 compounds (C1 through C20) tested in the pyrene actin assay (annotated number, catalog number, and the structures of each compound are shown).

**Supplementary Table S2:** A complete list of the second batch of the compounds (C21 through C42) evaluated for the SAR study (annotated number, catalog number, and the structures of each compound are shown).

Compound C1

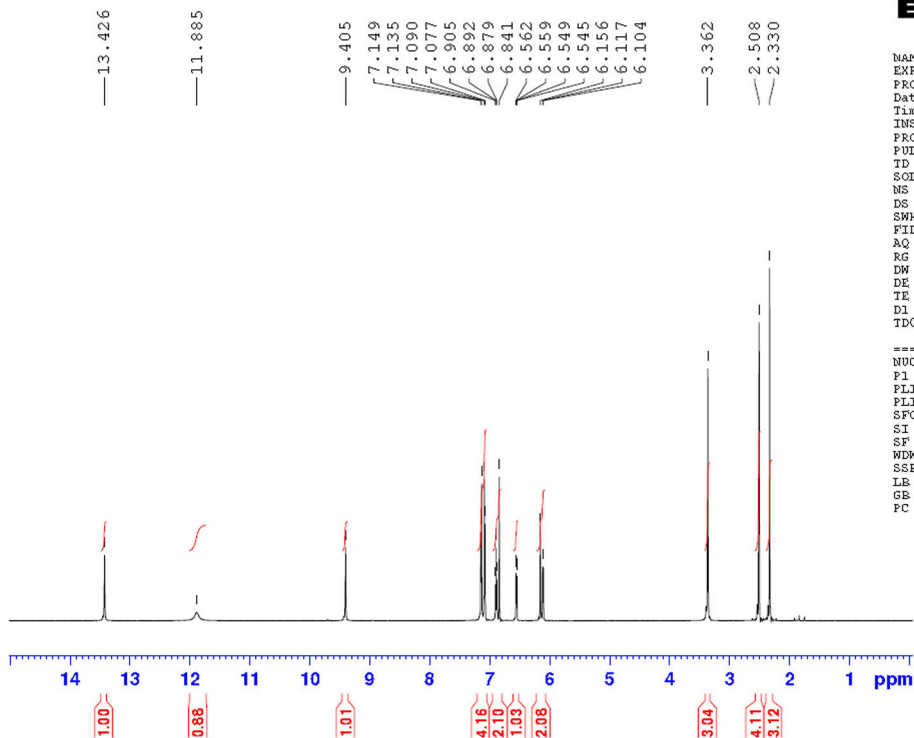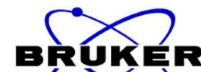

```

NAME          C2-gf
EXPNO         1
PROCNO        1
Date_         20160609
Time          11.07
INSTRUM       spect
PROBHD        5 mm CPTCI 1H-
PULPROG       zg30
TD            65536
ID            65536
SOLVENT       DMSO
NS            16
DS            2
SWH           12376.237 Hz
FIDRES        0.188846 Hz
AQ            2.6477449 sec
RG            8
DW            40.400 usec
DE            6.50 usec
TE            293.0 K
D1            1.00000000 sec
TD0           1

===== CHANNEL f1 =====
NUC1          1H
P1            7.38 usec
PL1           4.00 dB
PLW1          7.00000000 W
SF01          600.1337060 MHz
SI            32768
SF            600.1300000 MHz
WEX           EM
SSB           0
LB            0.30 Hz
GB            0
PC            1.00
    
```

Compound C2

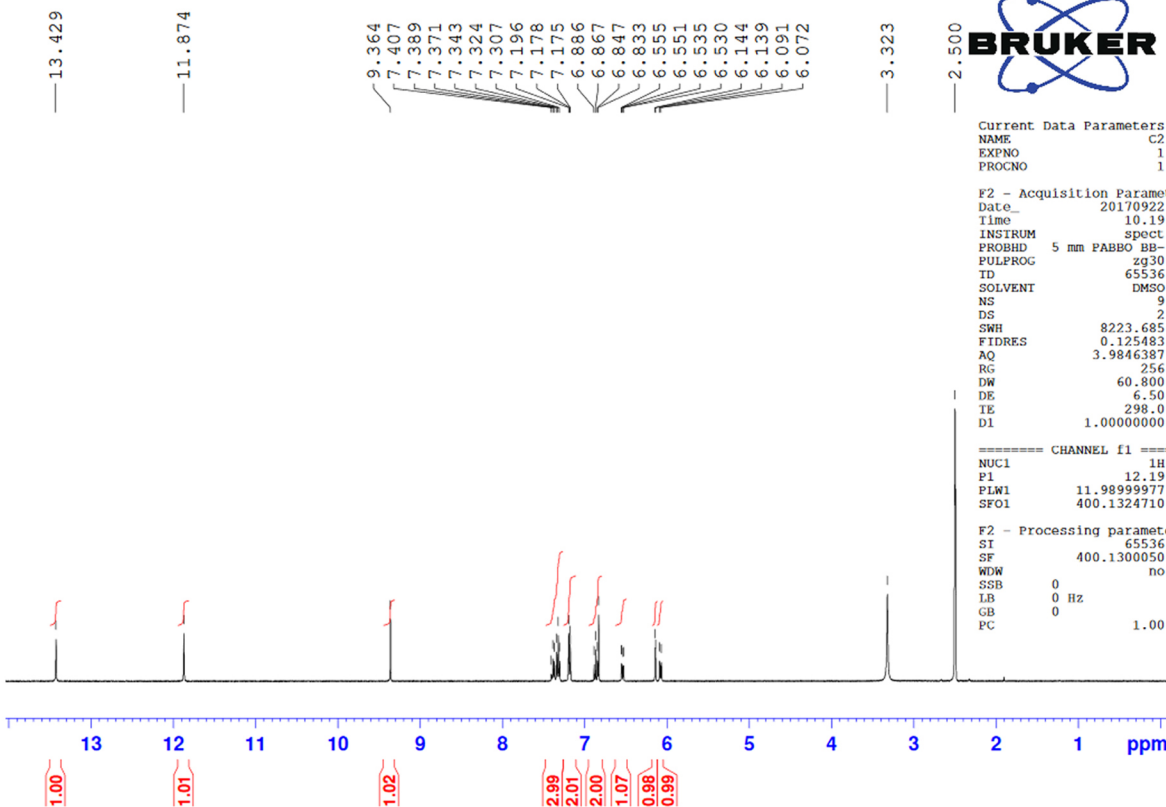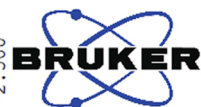

```

Current Data Parameters
NAME          C2
EXPNO         1
PROCNO        1

F2 - Acquisition Parameters:
Date_         20170922
Time          10.19
INSTRUM       spect
PROBHD        5 mm PABBO BB-
PULPROG       zg30
TD            65536
ID            65536
SOLVENT       DMSO
NS            9
DS            2
SWH           8223.685 Hz
FIDRES        0.125483 Hz
AQ            3.9846387 sec
RG            256
DW            60.800 usec
DE            6.50 usec
TE            298.0 K
D1            1.00000000 sec

===== CHANNEL f1 =====
NUC1          1H
P1            12.19 usec
PLW1          11.98999977 W
SF01          400.1324710 MHz

F2 - Processing parameters
SI            65536
SF            400.1300050 MHz
WDW           no
SSB           0
LB            0 Hz
GB            0
PC            1.00
    
```

## Compound C1

## Compound C2

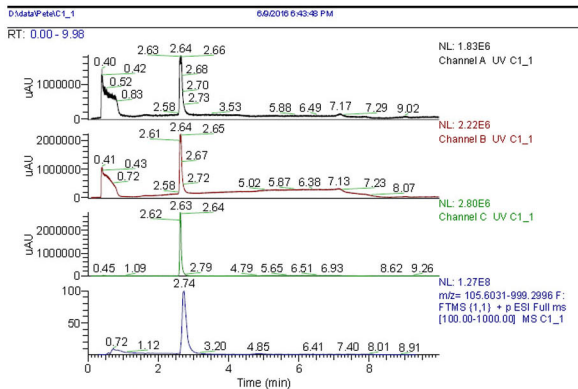

C1\_1\_#104-111 RT: 2.70-2.81 AV: 4 NL: 6.70E7  
T: FTMS (1,1) + p ESI Full ms [100.00-1000.00]

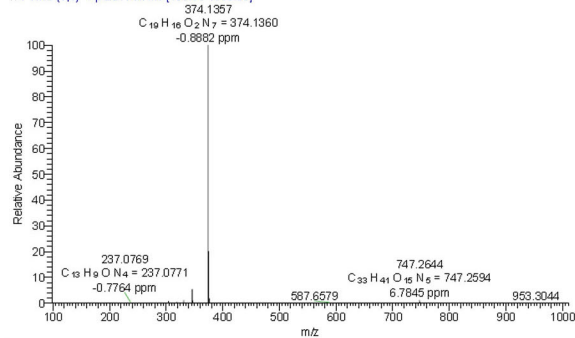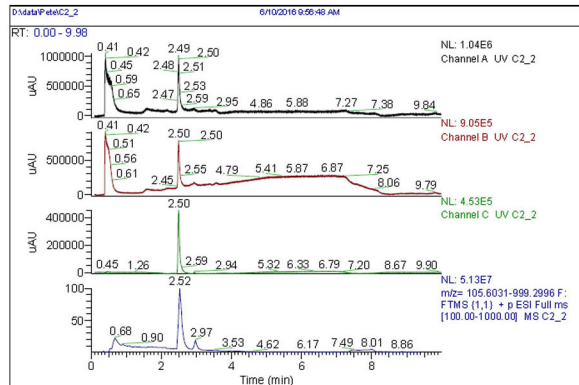

C2\_2\_#98-104 RT: 2.52-2.59 AV: 3 NL: 2.54E7  
T: FTMS (1,1) + p ESI Full ms [100.00-1000.00]

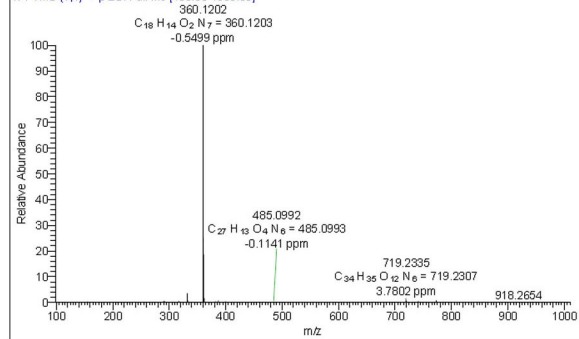

Gau et al.  
Supplementary Fig S3

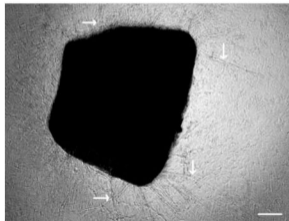

DMSO

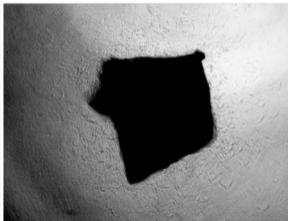

C1

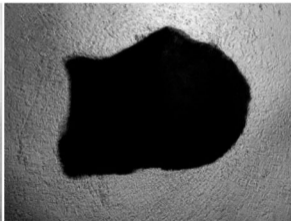

C2

## Supplementary Table S1

| Compound  | MolPort#            | Structure                                                                             |
|-----------|---------------------|---------------------------------------------------------------------------------------|
| <b>C1</b> | MolPort-000-139-035 | 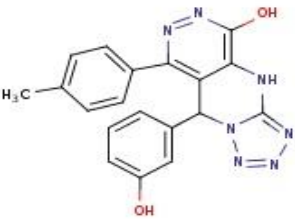    |
| <b>C2</b> | MolPort-000-139-027 |    |
| <b>C3</b> | MolPort-010-655-167 |  |
| <b>C4</b> | MolPort-008-332-724 |   |

|                  |                            |                                                                                      |
|------------------|----------------------------|--------------------------------------------------------------------------------------|
| <p><b>C5</b></p> | <p>MolPort-008-334-836</p> | 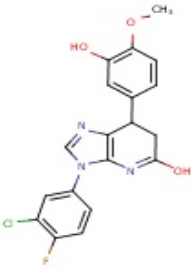   |
| <p><b>C6</b></p> | <p>MolPort-002-806-727</p> |    |
| <p><b>C7</b></p> | <p>MolPort-010-757-363</p> |   |
| <p><b>C8</b></p> | <p>MolPort-010-757-388</p> |  |
| <p><b>C9</b></p> | <p>MolPort-007-694-167</p> |  |

|                   |                            |                                                                                      |
|-------------------|----------------------------|--------------------------------------------------------------------------------------|
| <p><b>C10</b></p> | <p>MolPort-010-765-977</p> | 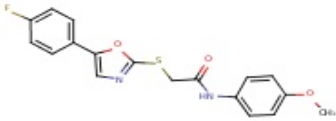   |
| <p><b>C11</b></p> | <p>MolPort-010-765-659</p> |    |
| <p><b>C12</b></p> | <p>MolPort-016-588-786</p> |   |
| <p><b>C13</b></p> | <p>MolPort-001-827-841</p> |  |
| <p><b>C14</b></p> | <p>MolPort-002-323-861</p> |  |

|                   |                            |                                                                                      |
|-------------------|----------------------------|--------------------------------------------------------------------------------------|
| <p><b>C15</b></p> | <p>MolPort-002-166-888</p> | 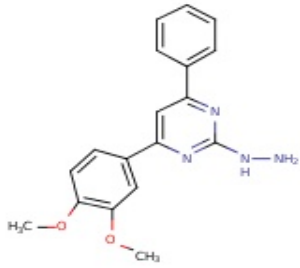   |
| <p><b>C16</b></p> | <p>MolPort-008-334-341</p> |    |
| <p><b>C17</b></p> | <p>MolPort-008-332-636</p> |   |
| <p><b>C18</b></p> | <p>MolPort-002-964-477</p> |  |
| <p><b>C19</b></p> | <p>MolPort-016-588-896</p> |  |



**C20**

MolPort-016-589-024

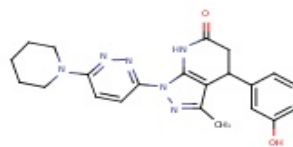

**SUPPLEMENTARY TABLE S2**

| Compound | MolPort#            | Structure                                                                             |
|----------|---------------------|---------------------------------------------------------------------------------------|
| C21      | MolPort-007-689-835 | 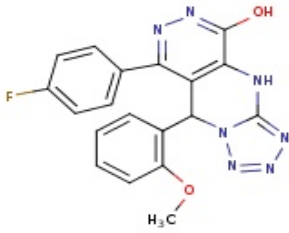   |
| C22      | MolPort-010-757-336 |     |
| C23      | MolPort-010-757-402 |   |
| C24      | MolPort-002-029-687 |  |

|                   |                            |                                                                                      |
|-------------------|----------------------------|--------------------------------------------------------------------------------------|
| <p><b>C25</b></p> | <p>MolPort-002-791-144</p> | 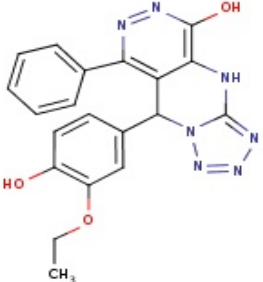  |
| <p><b>C26</b></p> | <p>MolPort-015-162-387</p> |    |
| <p><b>C27</b></p> | <p>MolPort-010-755-324</p> |  |
| <p><b>C28</b></p> | <p>MolPort-000-139-032</p> |  |
| <p><b>C29</b></p> | <p>MolPort-010-755-317</p> |  |

|                   |                            |                                                                                       |
|-------------------|----------------------------|---------------------------------------------------------------------------------------|
| <p><b>C30</b></p> | <p>MolPort-010-755-318</p> | 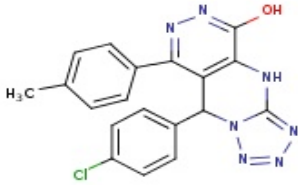    |
| <p><b>C31</b></p> | <p>MolPort-010-755-315</p> |     |
| <p><b>C32</b></p> | <p>MolPort-000-139-036</p> |    |
| <p><b>C33</b></p> | <p>MolPort-010-755-333</p> |  |
| <p><b>C34</b></p> | <p>MolPort-000-139-025</p> |   |

|                   |                            |                                                                                       |
|-------------------|----------------------------|---------------------------------------------------------------------------------------|
| <p><b>C35</b></p> | <p>MolPort-010-757-408</p> | 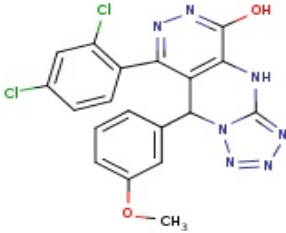   |
| <p><b>C36</b></p> | <p>MolPort-002-791-228</p> |    |
| <p><b>C37</b></p> | <p>MolPort-002-791-281</p> |   |
| <p><b>C38</b></p> | <p>MolPort-002-748-586</p> |  |
| <p><b>C39</b></p> | <p>MolPort-007-689-839</p> |  |

|            |                     |                                                                                                                                                                                                                                                                                                                                                                                                                                                                                                                                                                                                                                                 |
|------------|---------------------|-------------------------------------------------------------------------------------------------------------------------------------------------------------------------------------------------------------------------------------------------------------------------------------------------------------------------------------------------------------------------------------------------------------------------------------------------------------------------------------------------------------------------------------------------------------------------------------------------------------------------------------------------|
| <b>C40</b> | MolPort-010-755-336 | 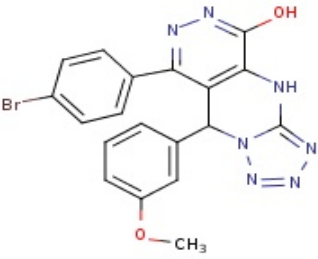 <p>Chemical structure of MolPort-010-755-336: A central carbon atom is bonded to a 4-bromophenyl ring, a 4-methoxyphenyl ring, a 1,2,4-triazol-5-ylidene group, and a 1,2,4-triazol-5-ylidene group. The central carbon is also bonded to a 1,2,4-triazol-5-ylidene group. The structure is a complex heterocyclic system with a central carbon atom bonded to a 4-bromophenyl ring, a 4-methoxyphenyl ring, a 1,2,4-triazol-5-ylidene group, and a 1,2,4-triazol-5-ylidene group. The central carbon is also bonded to a 1,2,4-triazol-5-ylidene group.</p> |
| <b>C41</b> | MolPort-000-139-041 |  <p>Chemical structure of MolPort-000-139-041: A central carbon atom is bonded to a 4-chlorophenyl ring, a 4-methoxyphenyl ring, a 1,2,4-triazol-5-ylidene group, and a 1,2,4-triazol-5-ylidene group. The central carbon is also bonded to a 1,2,4-triazol-5-ylidene group.</p>                                                                                                                                                                                                                                                                             |
| <b>C42</b> | MolPort-015-162-430 |  <p>Chemical structure of MolPort-015-162-430: A central carbon atom is bonded to a thiophene ring, a 3,4-dimethoxyphenyl ring, a 1,2,4-triazol-5-ylidene group, and a 1,2,4-triazol-5-ylidene group. The central carbon is also bonded to a 1,2,4-triazol-5-ylidene group.</p>                                                                                                                                                                                                                                                                              |
